# Supplementary material for: Interface engineering of hierarchical P-doped NiSe/2H-MoSe2nanorod arrays for efficient hydrogen evolution
Source: Royal Society of Chemistry journal article supplement (doi:10.1039/d2qi01498j), 2022-01-01
Supplement: d2qi01498j1.pdf [file d2qi01498j1.pdf]

## SUPPORTING INFORMATION

### **Interface engineering of hierarchical P-doped NiSe/2H-MoSe<sub>2</sub> nanorod arrays for efficient hydrogen evolution**

Xiaocheng Xu<sup>a</sup>, Rui Wang<sup>a</sup>, Sijie Chen<sup>a</sup>, Alex Trukhanov<sup>b</sup>, Yanxue Wu<sup>c</sup>, Lianyi Shao

<sup>a,\*</sup>, Le Huang<sup>a,\*</sup>, Zhipeng Sun<sup>a,\*</sup>

<sup>a</sup> School of Materials and Energy, Guangdong University of Technology, Guangzhou, 510006, Guangdong, China.

<sup>b</sup> Functional Materials Centre, SSPA Scientific and Practical Materials Research Centre of NAS of Belarus, 19 P. Brovki St., 220072, Minsk, Belarus.

<sup>c</sup> Analysis and Test Center, Guangdong University of Technology, Guangzhou, 510006, Guangdong, China.

Email: zpsunxj@gdut.edu.cn.

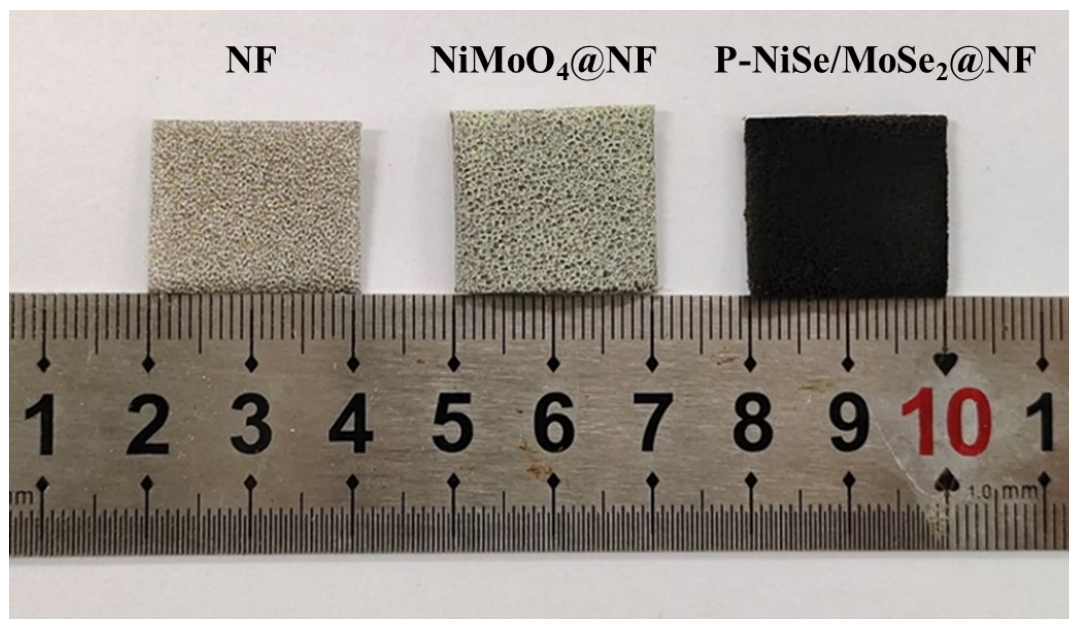

Fig. S1. Digital image of NF, NiMoO<sub>4</sub>@NF, and P-NiSe/MoSe<sub>2</sub>@NF catalysts.

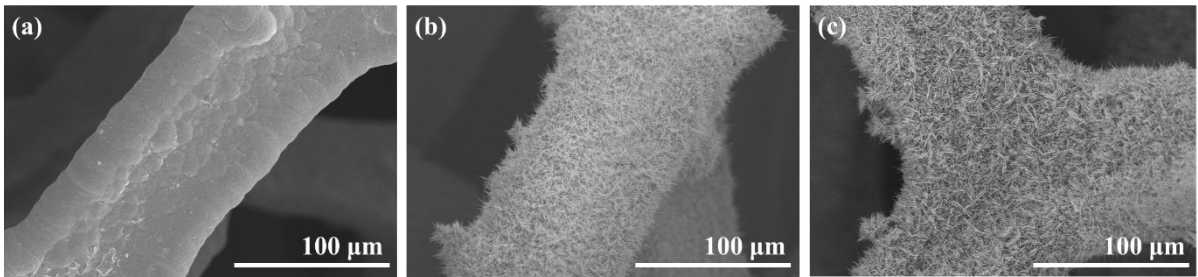

Fig. S2. SEM images of (a) NF, (b) NiMoO<sub>4</sub>@NF, and (c) P-NiSe/MoSe<sub>2</sub>@NF.

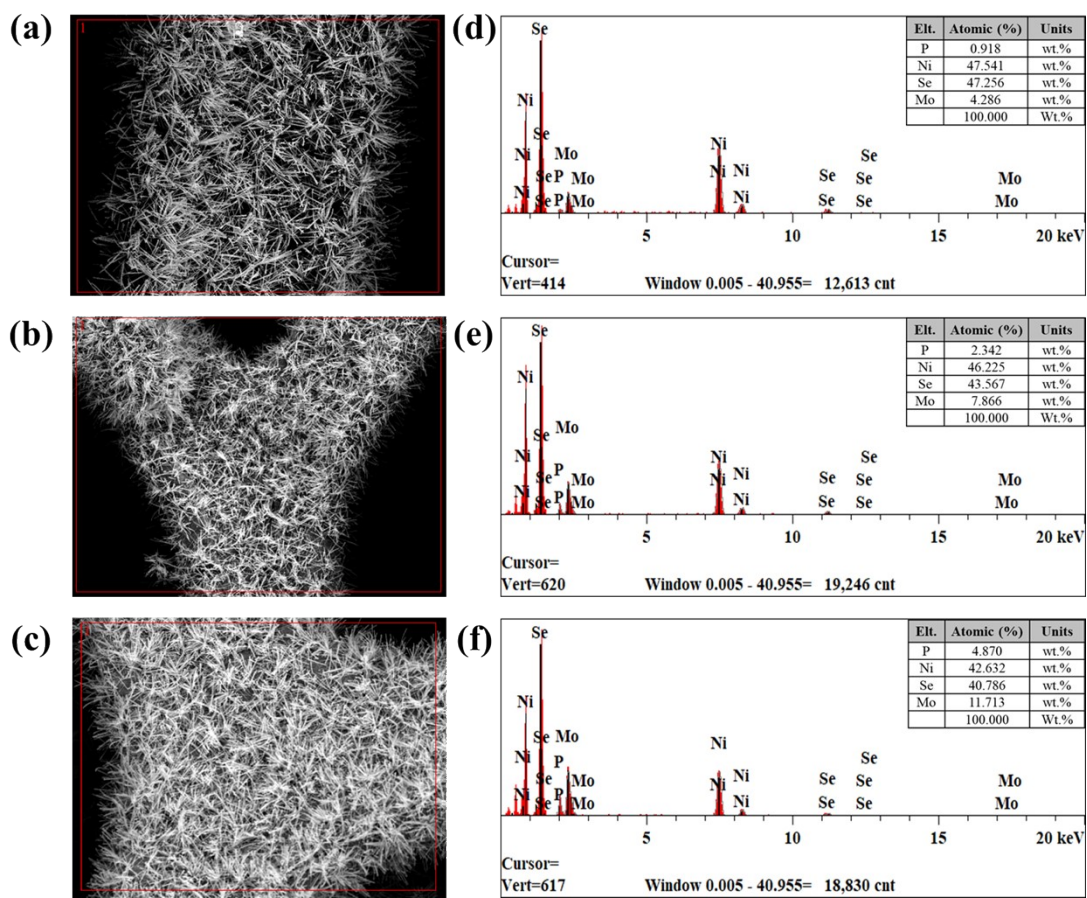

Fig. S3. SEM images and EDS analysis of (a, d) P-NiSe/MoSe<sub>2</sub>@NF-1, (b, e) P-NiSe/MoSe<sub>2</sub>@NF-2 and (c, f) P-NiSe/MoSe<sub>2</sub>@NF-3.

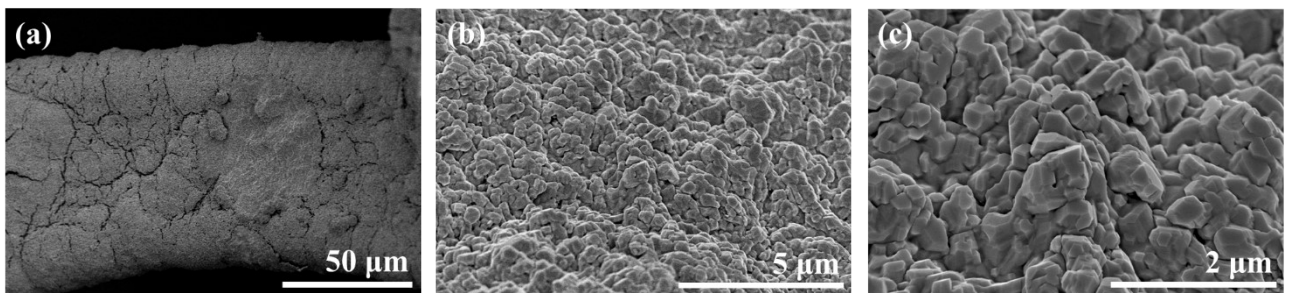

Fig. S4. SEM images of  $\text{Ni}_x\text{Se}_y@\text{NF}$  (a-c).

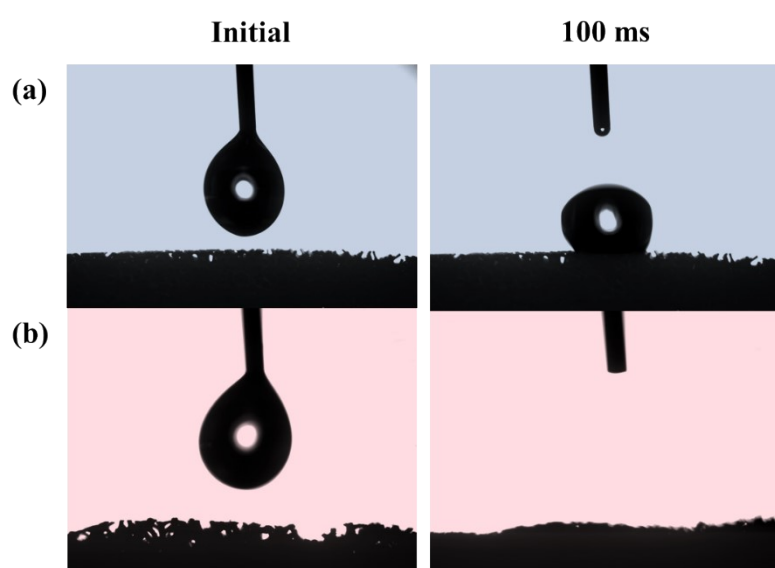

Fig. S5. Wettability test of (a) NF and (b) P-NiSe/MoSe<sub>2</sub>@NF electrode.

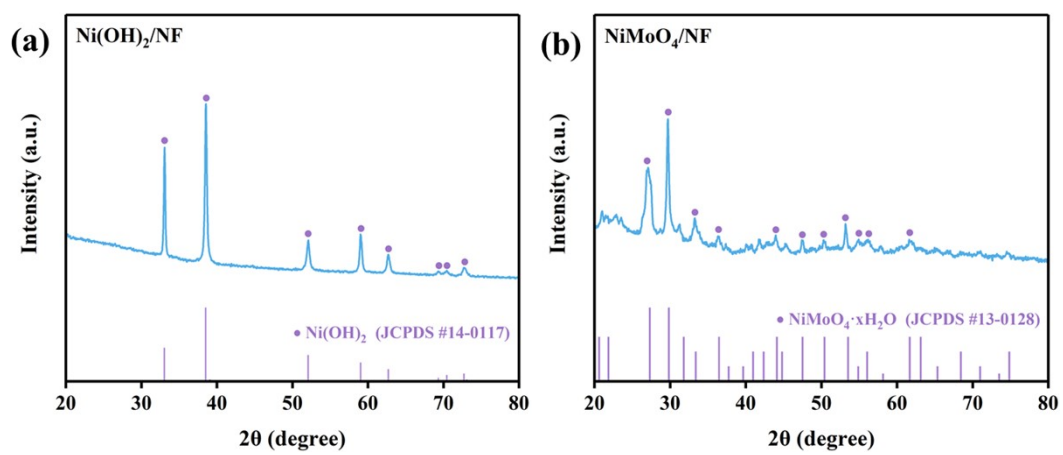

Fig. S6. The typical XRD pattern of (a) Ni(OH)<sub>2</sub>@NF and (b) NiMoO<sub>4</sub>@NF precursor.

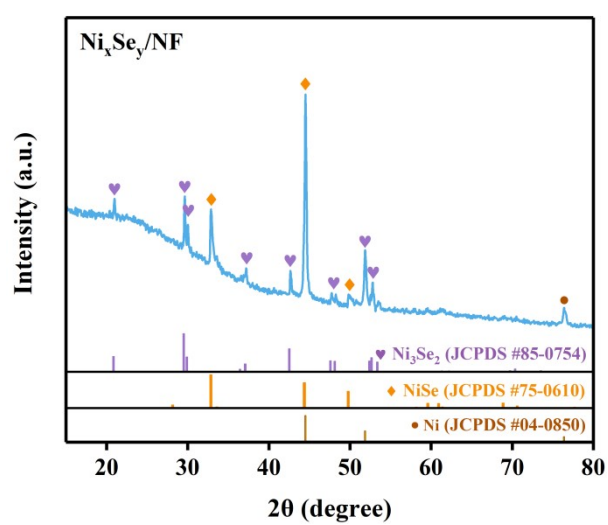

Fig. S7. XRD pattern of  $\text{Ni}_x\text{Se}_y/\text{NF}$ .



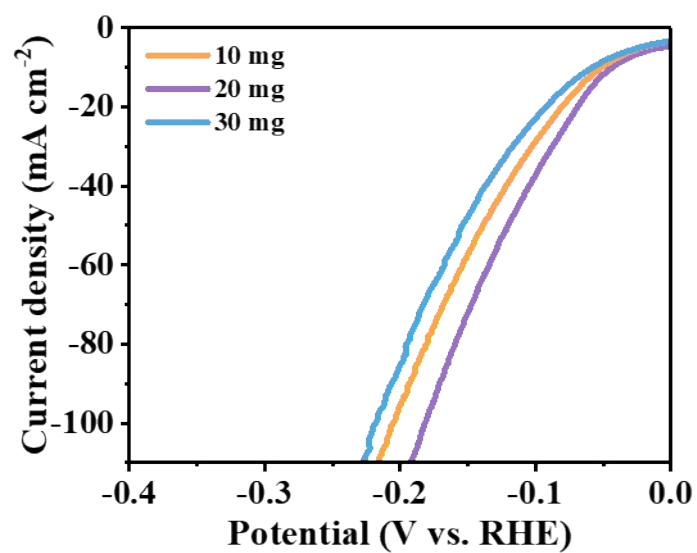

Fig. S8. LSV curves of samples with different doping amounts.

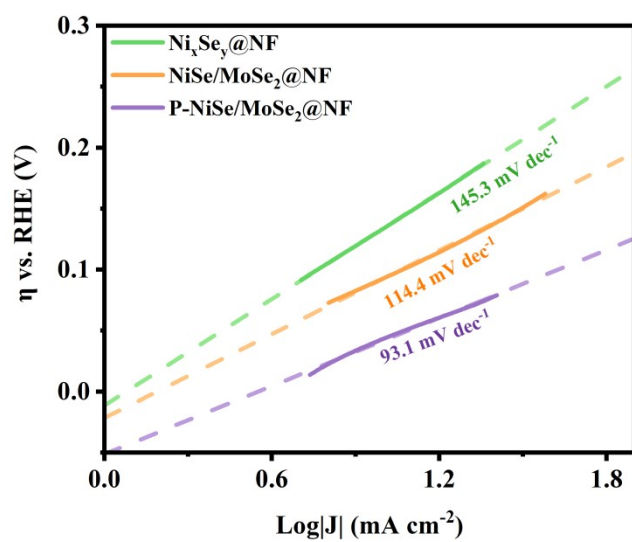

Fig. S9. Tafel plots of  $\text{Ni}_x\text{Se}_y@NF$ ,  $\text{NiSe/MoSe}_2@NF$ , and  $\text{P-NiSe/MoSe}_2@NF$  catalysts to calculate the exchange current density.

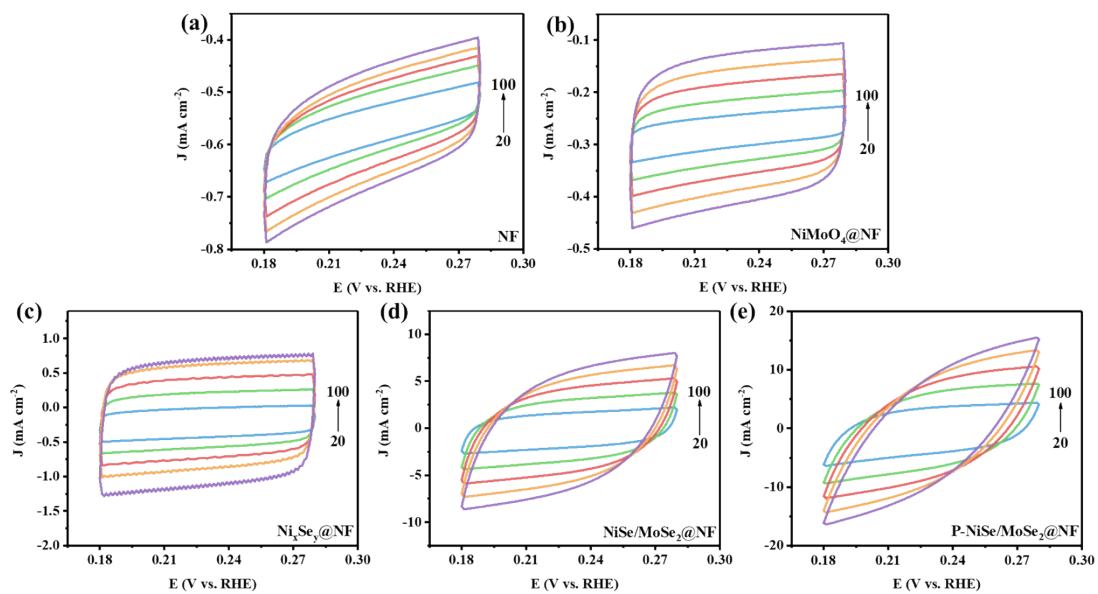

Fig. S10. CV curves within a non-faradaic reaction region of 0.18 ~ 0.28 V versus RHE at different scan rates for (a) NF (b) NiMoO<sub>4</sub>@NF, (c) Ni<sub>x</sub>Se<sub>y</sub>@NF, (d) NiSe/MoSe<sub>2</sub>@NF, and (e) P-NiSe/MoSe<sub>2</sub>@NF.

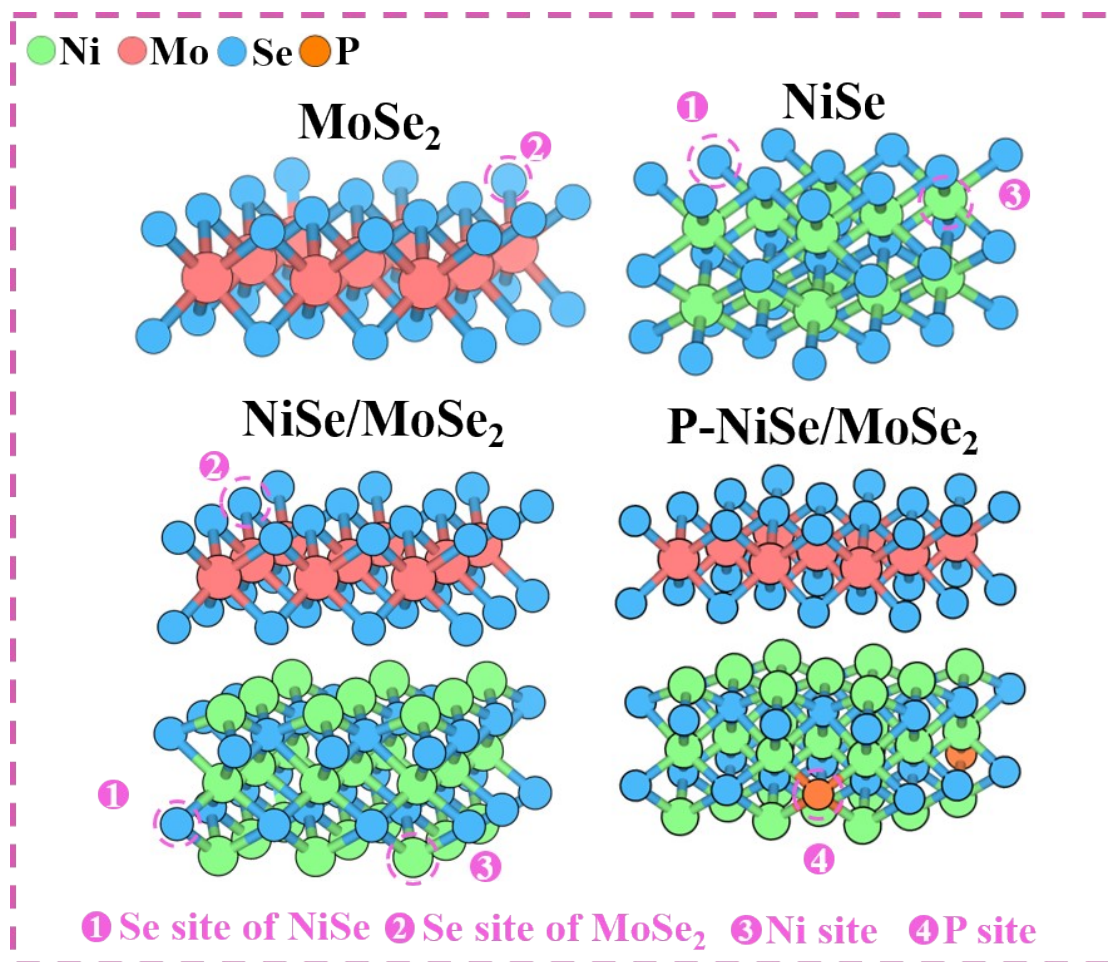

Fig. S11. Optimized geometric models of MoSe<sub>2</sub>, NiSe, NiSe/MoSe<sub>2</sub> and P-NiSe/MoSe<sub>2</sub> with possible H\* adsorption sites.

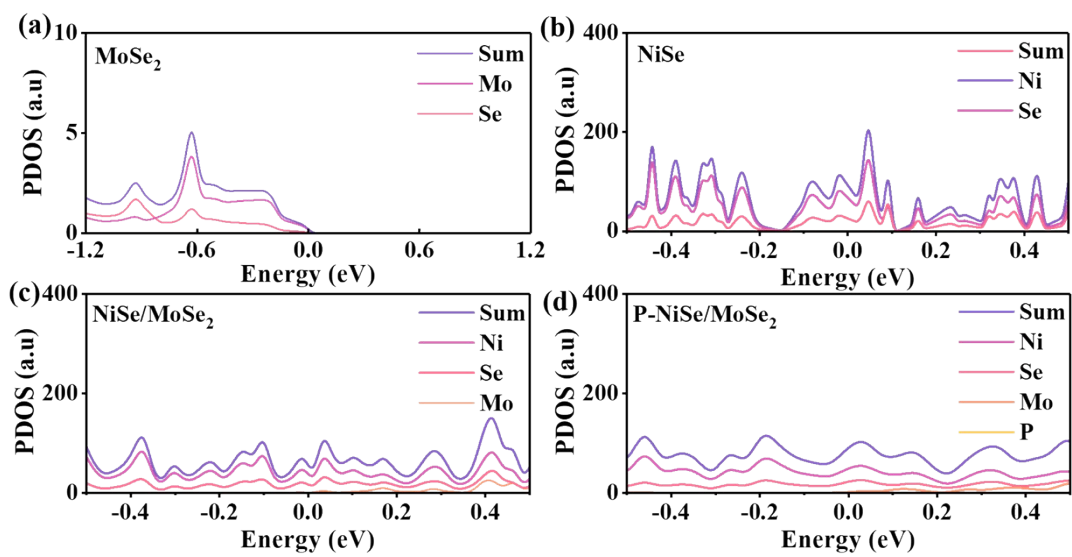

Fig. S12. Projected electronic density of states (PDOS) of (a) MoSe<sub>2</sub>, (b) NiSe, (c) NiSe/MoSe<sub>2</sub> and (d) P-NiSe/MoSe<sub>2</sub>.

---

Table S1. Amount of  $\text{NaH}_2\text{PO}_2$  used and phosphorus doping for different samples.

| <b>Sample</b>  | <b>Dosage of <math>\text{NaH}_2\text{PO}_2</math> (mg)</b> | <b>P atomic ratio (%)</b> |
|----------------|------------------------------------------------------------|---------------------------|
| P-NiSe/MoSe2-1 | 10 mg                                                      | 0.918                     |
| P-NiSe/MoSe2-2 | 20 mg                                                      | 2.342                     |
| P-NiSe/MoSe2-3 | 30 mg                                                      | 4.870                     |

Table S2. Comparison of HER catalytic performance of recently reported catalysts.

| Catalyst                                                                   | Electrolyte                          | $\eta_{10}$ vs. RHE<br>(mV) | $\eta_{100}$ vs. RHE<br>(mV)       | Ref              |
|----------------------------------------------------------------------------|--------------------------------------|-----------------------------|------------------------------------|------------------|
| <b>P-NiSe/MoSe<sub>2</sub>@NF</b>                                          | <b>1.0 M KOH</b>                     | <b>43</b>                   | <b>182</b>                         | <b>This work</b> |
| NiMoSe/NF-2                                                                | 1.0 M KOH                            | 91                          | 223                                | 1                |
| NiMoO <sub>4</sub> @MoSe <sub>2</sub> /Ni <sub>x</sub> Se <sub>y</sub> /NF | 1.0 M KOH                            | 69                          | /                                  | 2                |
| P-NiSe <sub>2</sub> /MoSe <sub>2</sub> @CC                                 | 1.0 M KOH                            | 175                         | /                                  | 3                |
|                                                                            | 0.5 M H <sub>2</sub> SO <sub>4</sub> | 93                          | /                                  |                  |
| 1T-MoSe <sub>2</sub> /NiSe                                                 | 1.0 M KOH                            | 120                         | 200 mV @<br>50 mA cm <sup>-2</sup> | 4                |
| MoSe <sub>2</sub> @Ni <sub>0.85</sub> Se                                   | 1.0 M KOH                            | 117                         | 204                                | 5                |
|                                                                            | 0.5 M H <sub>2</sub> SO <sub>4</sub> | 154                         | /                                  |                  |
| MoSe <sub>2</sub> -NiSe@C                                                  | 1.0 M KOH                            | 180                         | /                                  | 6                |
| MoSe <sub>2</sub> /NiSe <sub>2</sub> @CFP                                  | 0.5 M H <sub>2</sub> SO <sub>4</sub> | 193                         | 249                                | 7                |
| NiMoSe                                                                     | 0.5 H <sub>2</sub> SO <sub>4</sub>   | 197                         | /                                  | 8                |
| SC-NiSe/MoSe <sub>2</sub> @CFP                                             | 1.0 M KOH                            | 71                          | 129                                | 9                |
| Mo, S-codoped<br>NiSe/NF                                                   | 1.0 M KOH                            | 88                          | /                                  | 10               |
| NiMoSe@Ni <sub>0.33</sub> Mo <sub>0.67</sub> O <sub>4</sub>                | 1.0 M KOH                            | 82.1                        | /                                  | 11               |
| MoSe <sub>2</sub> /NiSe-2                                                  | 1.0 M KOH                            | 87                          | /                                  | 12               |

---

Table S3. The calculated adsorption energies (eV) of the hydrogen atom.

|                                           | Ni site | Se site | P site |
|-------------------------------------------|---------|---------|--------|
| MoSe <sub>2</sub>                         | --      | 2.10    | --     |
| NiSe                                      | 0.23    | 0.22    | --     |
| NiSe/MoSe <sub>2</sub> -NiSe              | 0.88    | 0.17    | --     |
| NiSe/MoSe <sub>2</sub> -MoSe <sub>2</sub> | --      | 1.60    | --     |
| P-NiSe/MoSe <sub>2</sub>                  | --      | --      | 0.16   |



---

## Reference

- 1 W. Feng, M. Bu, S. Kan, X. Gao, A. Guo, H. Liu, L. Deng, W. Chen, Interfacial hetero-phase construction in nickel/molybdenum selenide hybrids to promote the water splitting performance, *Applied Materials Today*, 2021, **25**, 101175.
- 2 Z. Zhang, S. Ye, J. Ji, Z. Li, F. Wang, Core/shell -structured NiMoO<sub>4</sub>@MoSe<sub>2</sub>/Ni<sub>x</sub>Se<sub>y</sub> Nanorod on Ni Foam as a Bifunctional Electrocatalyst for Efficient Overall Water Splitting, *Colloids Surf. A*, 2020, **599**, 124888.
- 3 M. Zhu, Q. Yan, Y. Xue, Y. Yan, K. Zhu, K. Ye, J. Yan, D. Cao, H. Xie, G. Wang, Free-Standing P-Doped NiSe<sub>2</sub>/MoSe<sub>2</sub> Catalyst for Efficient Hydrogen Evolution in Acidic and Alkaline Media, *ACS Sustain. Chem. Eng.*, 2022, **10**, 279–287.
- 4 X. Zhang, Y.-Y. Zhang, Y. Zhang, W.-J. Jiang, Q.-H. Zhang, Y.-G. Yang, L. Gu, J.-S. Hu, L.-J. Wan, Phase-Controlled Synthesis of 1T-MoSe<sub>2</sub>/NiSe Heterostructure Nanowire Arrays via Electronic Injection for Synergistically Enhanced Hydrogen Evolution, *Small Methods*, 2019, **3**, 1800317.
- 5 C. Wang, P. Zhang, J. Lei, W. Dong, J. Wang, Integrated 3D MoSe<sub>2</sub>@Ni<sub>0.85</sub>Se Nanowire Network with Synergistic Cooperation as Highly Efficient Electrocatalysts for Hydrogen Evolution Reaction in Alkaline Medium, *Electrochim. Acta*, 2017, **246**, 712–719.
- 6 C. Liu, K. Wang, X. Zheng, X. Liu, Q. Liang, Z. Chen, Rational design of MoSe<sub>2</sub>-NiSe@carbon heteronanostructures for efficient electrocatalytic hydrogen evolution in both acidic and alkaline media, *Carbon*, 2018, **139**, 1–9.
- 7 L. Zhang, T. Wang, L. Sun, Y. Sun, T. Hu, K. Xu, F. Ma, Hydrothermal synthesis of 3D hierarchical MoSe<sub>2</sub>/NiSe<sub>2</sub> composite nanowires on carbon fiber paper and their enhanced electrocatalytic activity for the hydrogen evolution reaction, *J. Mater. Chem. A*, 2017, **5**, 19752–19759.
- 8 K. Premnath, P. Arunachalam, M.S. Amer, J. Madhavan, A.M. Al-Mayouf, Hydrothermally synthesized nickel molybdenum selenide composites as cost-effective and efficient trifunctional electrocatalysts for water splitting reactions, *Int. J. Hydrog. Energy*, 2019, **44**, 22796–22805.
- 9 H. Ding, Q. Jiao, H. Lv, K. Xu, Q. Xing, M. Chen, W. Chu, X. Wu, Y. Guo, Promoting the water reduction reaction of transition metal dichalcogenides in a basic electrolyte by interface engineering, *J. Mater. Chem. A*, 2018, **6**, 17488–17494.
- 10 S. Zhang, X. Zhang, J. Li, E. Wang, Morphological and electronic modulation of NiSe nanosheet assemblies by Mo, S-codoping for an efficient hydrogen evolution reaction, *J. Mater. Chem. A*, 2017, **5**, 20588–20593.
- 11 T. He, Y. He, H. Li, X. Yin, L. Zhou, H. Shi, J. Ma, L. Chen, Core/shell NiMoSe@NiMoO<sub>4</sub> micro-cuboids anchored on Nickel foam as self-supported

---

electrode towards efficient and stable hydrogen generation, *J. Electroanal. Chem.*, 2022, **904**, 115829.

12 J.-Y. Xue, F.-L. Li, B. Chen, H. Geng, W. Zhang, W.-Y. Xu, H. Gu, P. Braunstein, J.-P. Lang, Engineering multiphase MoSe<sub>2</sub>/NiSe heterostructure interfaces for superior hydrogen production electrocatalysis, *Appl. Catal. B*, 2022, **312**, 121434.
